# Supplementary material for: Variations in Multiple Birth Rates and Impact on Perinatal Outcomes in Europe
Source: PLoS One. 2016 Mar 1;11(3):e0149252. doi: 10.1371/journal.pone.0149252 (PMC4773186; doi:10.1371/journal.pone.0149252)
Supplement: S1 Table — (XLSX) [file pone.0149252.s001.xlsx]

## Sheet: Table 1
Supplementary table 1: Multiple birth rates in the participating countries
	2004				2010				Change 2004–2010
	Twins	Triplets+	Twins	Triplets+	Twins	Triplets+	Twins	Triplets+	Twins	Triplets+
	N		/1000		N		/1000		%
BE: Brussels	262	9	16.3658	0.562184	554	14	22.6122	0.571429	6.24645	0.0092448
BE: Flanders	945	14	15.7616	0.233505	1297	18	18.8943	0.262219	3.13275	0.0287141
BE: Wallonia	NA	NA	-	-	636	7	16.8343	0.185283	-	-
Czech Republic	1791	19	18.6372	0.197715	2408	11	21.0478	0.0961488	2.41062	-0.101566
Denmark	1425	36	22.4824	0.567976	1298	6	20.8672	0.0964584	-1.61521	-0.471517
Germany	11246	323	17.659	0.507189	11553	266	18.4666	0.425182	0.807673	-0.082007
Estonia	167	1	12.0326	0.0720513	230	4	14.7002	0.255656	2.66768	0.183605
Ireland	925	19	15.0561	0.30926	1247	25	16.7804	0.336415	1.7243	0.027155
Spain	7712	266	17.2226	0.594036	9653	193	20.193	0.403734	2.97041	-0.190302
France	12058	216	15.8163	0.283324	13853	247	17.4	0.3	1.5837	0.016676
Italy	6147	261	11.499	0.488245	8091	361	15.0493	0.671462	3.55029	0.183217
Cyprus	189	12	23.4783	1.49068	209.72	12	25.102	1.43631	1.62372	-0.0543694
Latvia	232	2	11.4534	0.0987362	239	2	12.577	0.105247	1.12357	0.00651036
Lithuania	317	5	10.8169	0.170614	393	8	12.8566	0.261712	2.03968	0.0910981
Luxembourg	73	2	13.506	0.370028	118	1	18.323	0.15528	4.81697	-0.214748
Hungary	1570	65	16.7176	0.69213	NA	NA	-	-	-	-
Malta	50	6	13.0276	1.56331	74	6	18.7247	1.51822	5.69708	-0.0450956
Netherlands	3581	76	20.0309	0.425118	3105	59	17.655	0.335473	-2.37589	-0.0896446
Austria	1200	25	15.3888	0.320599	1336	30	17.2183	0.386638	1.82951	0.0660387
Poland	3894	67	10.988	0.18906	5486	105	13.401	0.25649	2.41296	0.0674305
Portugal	1444	41	13.3385	0.378725	1518	21	15.1453	0.20952	1.80681	-0.169205
Slovenia	311	3	17.6414	0.170174	406	5	18.4545	0.227273	0.813159	0.0570986
Slovakia	629	5	12.1036	0.0962131	799	9	14.5241	0.163601	2.4205	0.0673876
Finland	849	16	14.9267	0.281304	924	13	15.2927	0.215157	0.366011	-0.0661469
Sweden	1361	15	13.7373	0.151404	1593	29	14.0367	0.255534	0.299381	0.10413
United Kingdom	10455	168	14.7395	0.236848	12354	192	15.4563	0.240214	0.716764	0.00336683
UK: England and Wales	9368	153	14.7824	0.241428	11053	175	15.4487	0.244595	0.666284	0.00316699
UK: Northern Ireland	330	7	14.9409	0.316929	382	5	15.2629	0.199776	0.32199	-0.117152
UK: Scotland	757	8	14.149	0.149527	919	12	15.6316	0.204113	1.48264	0.0545858
Iceland	NA	NA	-	-	69	0	14.2739	0	-	-
Norway	1050	15	18.669	0.2667	1007	22	16.3636	0.357497	-2.30538	0.090797
Switzerland	NA	NA	-	-	1448	22	18.3794	0.279245	-	-
